# Supplementary material for: Reactive amphiphilic hollow SiO2 Janus nanoparticles for durable superhydrophobic coating
Source: Royal Society of Chemistry journal article supplement (doi:10.1039/d0nr02571b), 2020-01-01
Supplement: d0nr02571b1.pdf [file d0nr02571b1.pdf]

## Electronic Supplementary Information

### **Reactive amphiphilic hollow SiO<sub>2</sub> Janus nanoparticles for durable superhydrophobic coating**

Yan Bao<sup>\*a,b</sup>, Yuanxia Zhang<sup>a,b</sup>, Jianzhong Ma<sup>\*a,b</sup>

<sup>a</sup> *College of Bioresources Chemical and Materials Engineering, Shaanxi University of  
Science and Technology, Xi'an, 710021, PR, China.*

<sup>b</sup> *National Demonstration Center for Experimental Light Chemistry Engineering  
Education, Shaanxi University of Science and Technology, Xi'an, 710021, PR, China.*

*\*Corresponding author: Yan Bao, E-mail: baoyan@sust.edu.cn.*

*Jianzhong Ma, E-mail: majz@sust.edu.cn.*

## 1. Supporting Methods

*Preparation of Amphiphilic Hollow SiO<sub>2</sub> Janus Particles Labeled with Ag Nanoparticles:* Typically, 0.0168 g of AgNO<sub>3</sub> and 0.1 g of amphiphilic hollow SiO<sub>2</sub> Janus particles were dispersed in 10 mL of water at a temperature of 40°C under magnetic stirring for 2 h. Subsequently, 0.010g of N<sub>2</sub>H<sub>4</sub>·H<sub>2</sub>O was added into the above solution under magnetic stirring for 30 min. AgNPs were deposited on the amino side of amphiphilic hollow SiO<sub>2</sub> Janus particles by chemical reduction method. Finally, amphiphilic hollow SiO<sub>2</sub> Janus particles labeled with Ag nanoparticles were obtained by washing with ethanol, centrifugation and dry. Meanwhile, to compare the structural anisotropy of Janus particles, both sides of SiO<sub>2</sub> particles functionalized completely with amino were deposited by AgNPs using the same method.

*Preparation of Amphiphilic Hollow SiO<sub>2</sub> Janus Particles Labeled with Rhodamine B:* Firstly, 0.02134 g of EDCHCl, 0.00534 g of NHS and 0.0534 g of Rhodamine B were added into 20 mL of DMF. The mixture was stirred for 2 h under 80 °C. Then 0.05 g of amphiphilic hollow SiO<sub>2</sub> Janus particles was added and reacted for 6 h. After centrifugation, the amphiphilic hollow SiO<sub>2</sub> Janus particles labeled by rhodamine B were obtained.

*Preparation of Pickering Emulsion using Amphiphilic Hollow SiO<sub>2</sub> Janus Particles as stabilizer:* Soybean oil and aqueous dispersion of the amphiphilic hollow SiO<sub>2</sub> Janus particles (10 mL) were mixed at a given volume ratio (The ratio of oil to water is 1 to 9). Then, Pickering emulsion was obtained by ultrasonication using a SCIENTZ JTY92-IIN sonicator for 30 min. The concentration of the amphiphilic hollow SiO<sub>2</sub> Janus particles in water was 1 wt %.

## 2. Supporting Figure

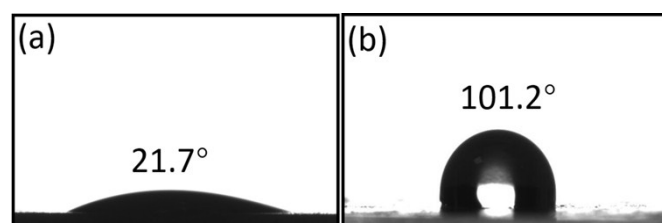

**Fig. S1** Water contact angle of (a) hollow SiO<sub>2</sub> particles and (b) KH570-modified hollow SiO<sub>2</sub> particles.

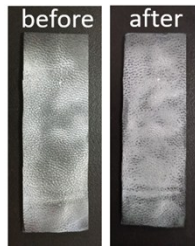

**Fig. S2** Photograph of leather coating surface before and after 140 cycles of abrasion in the sandpaper abrasion test.
